# Supplementary material
Source: ML conference proceedings conference paper supplement (https://proceedings.neurips.cc/paper_files/paper/2012/hash/84d9ee44e457ddef7f2c4f25dc8fa865-Abstract.html)
Supplement: Supplementary file 2 [file 84d9ee44e457ddef7f2c4f25dc8fa865-Supplemental.zip]

Archive with 1 entries (1 files):
- supplementary/Paper 199/supplement.pdf
